# Supplementary material for: Genetic architecture and biology of youth-onset type 2 diabetes
Source: PubMed Central journal article supplement (PMC10896722; doi:10.1038/s42255-023-00970-0), 2024-01-26
Supplement: 42255_2023_970_MOESM1_ESM.pdf [file 42255_2023_970_MOESM1_ESM.pdf]

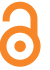

---

# Genetic architecture and biology of youth-onset type 2 diabetes

---

In the format provided by the authors and unedited

1 **Complete list of the ProDiGY consortium working group members**

2

3 ***ProDiGY***

4 The following individuals constitute the ProDiGY Study Group: M.H. Black (Janssen  
5 Pharmaceuticals), B. Burke (George Washington University), L. Chen (Massachusetts General  
6 Hospital), D. Dabelea (University of Colorado), J. Divers (New York University), K. Drews (George  
7 Washington University), J. Flannick (Boston Children's Hospital & Broad Institute), J.C. Florez  
8 (Massachusetts General Hospital & Broad Institute), M. Kelsey (University of Colorado), J.  
9 Mercader (Massachusetts General Hospital & Broad Institute), A. Manning (Massachusetts  
10 General Hospital & Broad Institute, T. Pollin (University of Maryland), N. Santoro (Yale University),  
11 R.Shah (Children's Hospital of Philadelphia), S. Srinivasan (University of San Francisco), J Todd  
12 (University of Vermont), P. Zeitler (University of Colorado).

13

14 ProDiGY is a collaborative effort to understand the genetic predisposition of youth-onset T2D  
15 using multi-ethnic diabetes cases from SEARCH, TODAY, and the TODAY Genetics study. The  
16 following individuals and institutions constitute the SEARCH, TODAY and TODAY Genetics Study  
17 Groups (\* indicates principal investigator or director):

18

19 ***SEARCH for Diabetes in Youth study group***

20 California, USA P Hung, C Koebnick, J M Lawrence\*, X Li, E Lustigova (Kaiser Permanente  
21 Southern California, Pasadena); D J Pettitt (Santa Barbara)\*. North Carolina, USA E J Mayer-  
22 Davis\*, A Mottl, J Thomas (University of North Carolina, Chapel Hill). South Carolina, USA M  
23 Jackson, L Knight, C Turley (University of South Carolina, Columbia); D Bowlby (Medical  
24 University of South Carolina, Charleston); J Amrhein, E Apperson, B Nelson (Greenville Health  
25 System and Eau Claire Cooperative Health Center, Columbia). Colorado, USA T Crume, D  
26 Dabelea\*, R F Hamman, A Shapiro, L Testaverde (Colorado School of Public Health, University  
27 of Colorado, Denver); G J Klingensmith, D Maahs, M J Rewers, P Wadwa (Barbara Davis Center  
28 for Childhood Diabetes, Aurora); S Daniels, M G Kahn, G Wilkening (Children's Hospital Colorado,  
29 Aurora); C A Bloch (Pediatric Endocrine Associates, Greenwood Village); J Powell (Indian Health  
30 Service, Navajo Area); K Love-Osborne (Denver Health and Hospitals Authority, Denver);

1 Arizona, USA D C Hu (Tuba City Regional Health Care Center, Tuba City); Ohio, USA L M Dolan\*,  
2 A Standiford, E M Urbina (University of Cincinnati, Cincinnati); Washington, USA I Hirsch, G Kim,  
3 F Malik, L Merjaneh, C Pihoker\*, A Roberts, C Taplin, J Yi-Frazier (University of Washington,  
4 Seattle); N Beauregard, C Franklin, C Gangan, S Kearns, M Klingsheim, B Loots, M Pascual  
5 (Seattle Children's Hospital, Seattle); C Greenbaum (Benaroya Research Institute, Seattle). \*D J  
6 Pettitt retired in September, 2014.

7

### 8 **TODAY and TODAY Genetics study group**

9 **Clinical centers** Baylor College of Medicine: S. McKay\*, M. Haymond\*, B. Anderson, C. Bush,  
10 S. Gunn, H. Holden, G. Jeha, S.M. Jones, N. Kamith, S. McGirk, N. Miranda, A. Pihlaskari, S.  
11 Thamocharan, R. Zagado Case Western Reserve University: L. Cuttler (deceased)\*, S.  
12 Narasimhan\* E. Abrams, T. Casey, W. Dahms (deceased), C. Ievers-Landis, B. Kaminski, M.  
13 Koontz, S. MacLeish, P. McGuigan Children's Hospital Central California: S. Banerjee\*, A. Bily,  
14 N. Delabruere, A. Evaristo Children's Hospital Los Angeles: M. Geffner\*, V. Barraza, N.  
15 Castaneda, N. Chang, B. Conrad, D. Dreimane, S. Estrada, L. Fisher, E. Fleury-Milfort, S.  
16 Hernandez, B. Hollen, F. Kaufman, E. Law, V. Mansilla, D. Miller, C. Muñoz, R. Ortiz, A. Ward, K.  
17 Wexler, Y.K. Xu, P. Yasuda Children's Hospital of Philadelphia: L. Levitt Katz\*, R. Berkowitz, S.  
18 Boyd, N. Chaudhary, C. Clark, K. Gralewski, B. Johnson, P. Kanan, J. Kaplan, C. Keating, C.  
19 Lassiter, R. Liillii, T. Lipman, G. McGinley, H. McKnight, B. Schwartzman, R. Shah, R. Volpe, S.  
20 Willi Children's Hospital of Pittsburgh: S. Arslanian\*, L. Bednarz, F. Bacha, S. Foster, B. Galvin,  
21 T. Hannon, A. Kriska, I. Libman, M. Marcus, K. Porter, D. Shearer, T. Songer, E. Venditti  
22 Children's Mercy Hospital Kansas City: F. Ugrasbul\*, J. Bedard, J. Jacobson, T. Luetjen Columbia  
23 University Medical Center: R. Goland\*, G. Covington, D. Gallagher, P. Kringas, N. Leibel, D. Ng,  
24 M. Ovalles, B. Park, D. Seidman Connecticut Clinical Medical Center Children's Hospital: E.  
25 Estrada\*, H. Nielsen Emory University: A. Muir\*, E. Ivie, P. Jenkins, K. Lindsley Indiana University:  
26 Z. Nabhan\*, P. Didrick Joslin Diabetes Center: L. Laffel\*, A. Benier, A. Goebel-Fabbri, M. Hall, L.  
27 Higgins, J. Keady, M. Malloy, K. Milaszewski, L. Rasbach Massachusetts General Hospital: D.M.  
28 Nathan\*, L. Levitsky\*, A. Angelescu, L. Bissett, C. Ciccarella, L. Delahanty, V. Goldman, O. Hardy,  
29 E. Javier, M. Larkin, R. McEachern, D. Norman, D. Nwosu, S. Park-Bennett, R. Pompei, D.  
30 Richards, N. Sherry, B. Steiner Saint Louis University: S. Tollefsen\*, S. Carnes, D. Dempsher, D.  
31 Flomo, T. Whelan, B. Wolff State University of New York Upstate Medical University: R.  
32 Weinstock\*, R. Izquierdo, D. Bowerman, S. Bzdick, J. Bulger, P. Conboy, J. Hartsig, R. Izquierdo,  
33 J. Kearns, R. Saletsky, P. Trief Texas Tech University: D. Dreimane\*, C. Lovett, C. Scott-Johnson

1 University of Arkansas: A. Morales\*, C. Moreau University of California San Diego: M. Gottschalk\*  
2 University of Colorado Denver: P. Zeitler\* (Steering Committee Chair), N. Abramson, A.  
3 Bradhurst, N. Celona-Jacobs, M. Downey, J. Higgins, A. Hull, M.M. Kelsey, G. Klingensmith, R.  
4 Morehead, K. Nadeau, H. Tyrrell, T. Witten University of Florida: J. Silverstein\*, E. Dougherty, T.  
5 Lyles University of Oklahoma Health Sciences Center: K. Copeland\* (Steering Committee Vice-  
6 Chair), E. Boss, R. Brown, J. Chadwick, L. Chalmers, S. Chernausek, A. Hebensperger, C.  
7 Macha, R. Newgent, A. Nordyke, D. Olson, T. Poulsen, L. Pratt, J. Preske, J. Schanuel, S.  
8 Sternlof, M. Zarate University of Texas Health Science Center at San Antonio: J. Lynch\*, D. Hale\*,  
9 N. Amodei, R. Barajas, C. Cody, J. Hernandez, C. Ibarra, E. Morales, S. Rivera, G. Rupert, A.  
10 Wauters Vanderbilt University: A. Potter\*, M. Black, F. Brendle, A. Shannon Washington  
11 University in St Louis: N. White\*, A. Arbeláez, D. Flomo, J. Jones, T. Jones, M. Sadler, A. Starnes,  
12 M. Tanner, A. Timpson, R. Welch Yale University: S. Caprio\*, E. Duran, M. Grey, C. Guandalini,  
13 S. Lavietes, P. Rose, A. Syme, W. Tamborlane

14 **Coordinating center** George Washington University Biostatistics Center: K. Hirst\*, B. Burke, S.  
15 Edelstein, P. Feit, N. Grover, C. Long, L. Pyle

16 **Project office** National Institute of Diabetes and Digestive and Kidney Diseases: B. Linder\*

17 **Central units** Central Blood Laboratory (Northwest Lipid Research Laboratories, University of  
18 Washington): S.M. Marcovina\*, J. Harting, M. Ramirez, G. Strylewicz University of Maryland  
19 School of Medicine: T. Pollin\*, A. Shuldiner\*

20
